# Supplementary material
Source: PubMed Central journal article supplement (PMC5645024)
Supplement: NIHMS906837-supplement-1.pdf [file NIHMS906837-supplement-1.pdf]

**Supplementary Table S1. Patient demographics and clinical assessment for each cytokine assayed**

| <b>Cytokine</b> | <b>Disease, <i>n</i></b> | <b>Sex, <i>n</i></b>  | <b>Race, <i>n</i></b>                            | <b>Mean Age (years), range</b> | <b>Mean CDASI/CLASI, range</b> |
|-----------------|--------------------------|-----------------------|--------------------------------------------------|--------------------------------|--------------------------------|
| TNF- $\alpha$   | DM, 13                   | Female, 12<br>Male, 1 | African American, 1<br>Asian, 1<br>Caucasian, 11 | 60.1, 30 to 80                 | 18.8, 6 to 36                  |
|                 | CLE, 6                   | Female, 5<br>Male, 1  | African American, 4<br>Caucasian, 2              | 40.2, 22 to 51                 | 9.2, 0 to 17                   |
|                 | Controls, 6              | Female, 6             | Caucasian, 6                                     | 35.3, 27 to 60                 | N/A                            |
| IFN- $\alpha$   | DM, 7                    | Female, 7             | Asian, 1<br>Caucasian, 6                         | 55.1, 30 to 67                 | 13.7, 6 to 25                  |
|                 | CLE, 5                   | Female, 5             | African American, 3<br>Caucasian, 2              | 43.6, 22 to 55                 | 8.2, 0 to 19                   |
|                 | Controls, 5              | Female, 5             | Caucasian, 5                                     | 33.7, 25 to 57                 | N/A                            |

**Supplementary Figure S1.** Effects of HCQ and QC on intracellular expression of TNF- $\alpha$  in LPS-stimulated mDCs and monocytes of a representative DM patient. The dot plot graphs show the results of flow cytometric analyses demonstrating the extent of intracellular expression of TNF- $\alpha$  in the (a) CD11c<sup>+</sup> mDCs of a representative DM patient; (b) CD14<sup>+</sup> monocytes of a representative DM patient. The numbers in parentheses and in bold in the upper right corner of each graph represent the MFI and the percentage of cells positive for TNF- $\alpha$ , respectively.

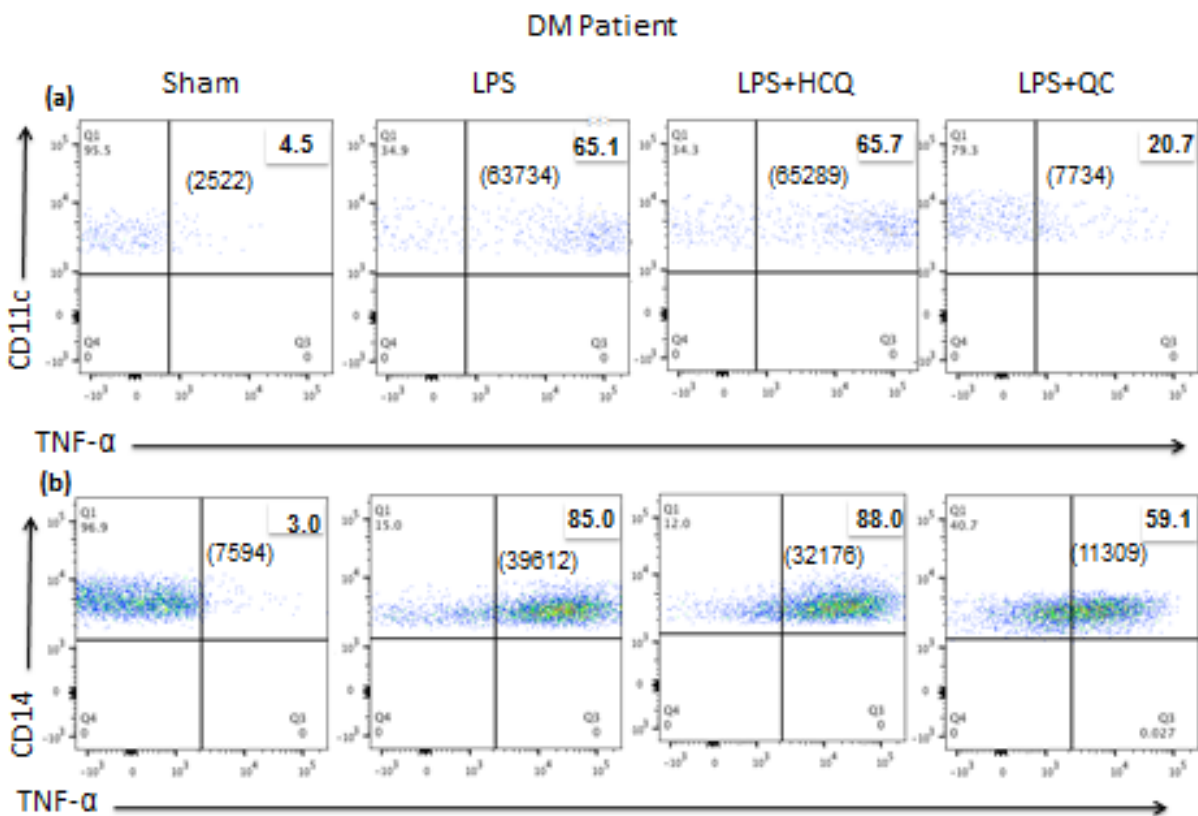

**Supplementary Figure S1**
